# Supplementary material for: Pre-Clinical Evaluation of Efficacy and Safety of Human Limbus-Derived Stromal/Mesenchymal Stem Cells with and without Alginate Encapsulation for Future Clinical Applications
Source: MDPI journal article supplement (doi:10.3390/cells12060876), 2023-03-11
Supplement: s1 [file s1]

# Pre-clinical evaluation of efficacy and safety of human limbus-derived stromal/mesenchymal stem cells with and without alginate encapsulation for future clinical applications

Mukesh Damala,<sup>1,2</sup> Abhishek Sahoo,<sup>1</sup> Naveen Pakalapati,<sup>1</sup> Vivek Singh,<sup>1,\*</sup> and Sayan Basu<sup>1,\*</sup>

Supplementary Information

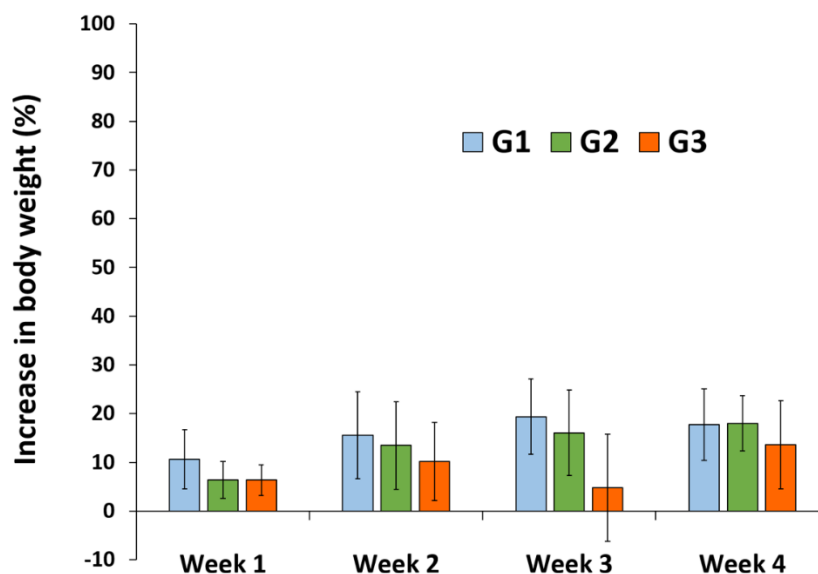

**Supplementary Figure S1.** The rabbit's relative body weight growth (%) after hLMSC therapy. Post-treatment rabbit weight graph. Three hLMSC-treated rabbit groups (n=6). On treatment day and weeks 1–4, they were weighed in kg. Plotting the weight gain since treatment. Mean  $\pm$  SD;  $p > 0.05$ . Statistical analysis was done with t-test. G1: Sham-treated group; G2: Cells without encapsulation/transit (En- hLMSCs); G3: Cells post-encapsulation and transit (En+ hLMSCs).

**Supplementary Table S1.** Ophthalmic lesion grading.

| Observation                                                                                               | Score |
|-----------------------------------------------------------------------------------------------------------|-------|
| <b>Corneal opacity</b>                                                                                    |       |
| No ulcers or opacities                                                                                    | 0     |
| Scattered or diffuse opacity; iris details clearly visible.                                               | 1     |
| Visible translucent area; iris details obscured.                                                          | 2     |
| Nacreous area; no iris details; pupil barely visible.                                                     | 3     |
| Opaque cornea covers up iris.                                                                             | 4     |
| <b>Iris</b>                                                                                               |       |
| Normal                                                                                                    | 0     |
| Deepened rugae, congestion, swelling, moderate circumcorneal hyperemia, or injection; light-reactive iris | 1     |
| Bleeding, destruction, or light insensitivity (any or all of these)                                       | 2     |
| <b>Conjunctival Redness</b> (refers to palpebral and bulbar conjunctivae; excluding cornea and iris)      |       |
| Normal blood vessels                                                                                      | 0     |
| Hyperaemic vessels exist (injected)                                                                       | 1     |
| Diffuse, crimson; vessels hard to see.                                                                    | 2     |
| Diffuse beefy red                                                                                         | 3     |
| <b>Chemosis</b> (swelling of lids and/or nictitating membranes)                                           |       |
| No swelling (Normal)                                                                                      | 0     |
| Extra swelling (includes nictitating membranes)                                                           | 1     |
| Swelling and lids partially everted                                                                       | 2     |
| Swelling, lids half closed                                                                                | 3     |
| Swelling, with lids more than half closed                                                                 | 4     |

Ophthalmic parameters and severity scores. En-/En+ hLMSCs treated three groups of six rabbits with corneal wounds.

**Supplementary Table S2.** Summary of ocular lesions in ophthalmic observations.

| Time Point                  | G1 Normal Eye | G1 Treated Eye    | G2 Normal Eye | G2 Treated Eye    | G3 Normal Eye | G3 Treated Eye |
|-----------------------------|---------------|-------------------|---------------|-------------------|---------------|----------------|
| <b>Conjunctival redness</b> |               |                   |               |                   |               |                |
| Pre-dose                    | 0 (6 of 6)    | 0 (6 of 6)        | 0 (6 of 6)    | 0 (6 of 6)        | 0 (6 of 6)    | 0 (6 of 6)     |
| 3 hours                     | 0 (6 of 6)    | <b>1 (6 of 6)</b> | 0 (6 of 6)    | <b>1 (6 of 6)</b> | 0 (6 of 6)    | 0 (6 of 6)     |
| 6 hours                     | 0 (6 of 6)    | <b>1 (1 of 6)</b> | 0 (6 of 6)    | <b>1 (6 of 6)</b> | 0 (6 of 6)    | 0 (6 of 6)     |
| 12 hours                    | 0 (6 of 6)    | 0 (6 of 6)        | 0 (6 of 6)    | 0 (6 of 6)        | 0 (6 of 6)    | 0 (6 of 6)     |
| 24 hours                    | 0 (6 of 6)    | 0 (6 of 6)        | 0 (6 of 6)    | 0 (6 of 6)        | 0 (6 of 6)    | 0 (6 of 6)     |
| day 7                       | 0 (6 of 6)    | 0 (6 of 6)        | 0 (6 of 6)    | 0 (6 of 6)        | 0 (6 of 6)    | 0 (6 of 6)     |
| day 14                      | 0 (6 of 6)    | 0 (6 of 6)        | 0 (6 of 6)    | 0 (6 of 6)        | 0 (6 of 6)    | 0 (6 of 6)     |
| day 21                      | 0 (6 of 6)    | 0 (6 of 6)        | 0 (6 of 6)    | 0 (6 of 6)        | 0 (6 of 6)    | 0 (6 of 6)     |
| day 28                      | 0 (6 of 6)    | 0 (6 of 6)        | 0 (6 of 6)    | 0 (6 of 6)        | 0 (6 of 6)    | 0 (6 of 6)     |
| <b>Corneal opacity</b>      |               |                   |               |                   |               |                |
| Pre-dose                    | 0 (6 of 6)    | 0 (6 of 6)        | 0 (6 of 6)    | 0 (6 of 6)        | 0 (6 of 6)    | 0 (6 of 6)     |
| 3 hours                     | 0 (6 of 6)    | 0 (6 of 6)        | 0 (6 of 6)    | 0 (6 of 6)        | 0 (6 of 6)    | 0 (6 of 6)     |
| 6 hours                     | 0 (6 of 6)    | 0 (6 of 6)        | 0 (6 of 6)    | 0 (6 of 6)        | 0 (6 of 6)    | 0 (6 of 6)     |
| 12 hours                    | 0 (6 of 6)    | 0 (6 of 6)        | 0 (6 of 6)    | 0 (6 of 6)        | 0 (6 of 6)    | 0 (6 of 6)     |
| 24 hours                    | 0 (6 of 6)    | 0 (6 of 6)        | 0 (6 of 6)    | 0 (6 of 6)        | 0 (6 of 6)    | 0 (6 of 6)     |
| day 7                       | 0 (6 of 6)    | 0 (6 of 6)        | 0 (6 of 6)    | 0 (6 of 6)        | 0 (6 of 6)    | 0 (6 of 6)     |
| day 14                      | 0 (6 of 6)    | 0 (6 of 6)        | 0 (6 of 6)    | 0 (6 of 6)        | 0 (6 of 6)    | 0 (6 of 6)     |
| day 21                      | 0 (6 of 6)    | 0 (6 of 6)        | 0 (6 of 6)    | 0 (6 of 6)        | 0 (6 of 6)    | 0 (6 of 6)     |
| day 28                      | 0 (6 of 6)    | 0 (6 of 6)        | 0 (6 of 6)    | 0 (6 of 6)        | 0 (6 of 6)    | 0 (6 of 6)     |
| <b>Lesions in Iris</b>      |               |                   |               |                   |               |                |
| <b>Pre-dose</b>             | 0 (6 of 6)    | 0 (6 of 6)        | 0 (6 of 6)    | 0 (6 of 6)        | 0 (6 of 6)    | 0 (6 of 6)     |
| 3 hours                     | 0 (6 of 6)    | 0 (6 of 6)        | 0 (6 of 6)    | 0 (6 of 6)        | 0 (6 of 6)    | 0 (6 of 6)     |
| 6 hours                     | 0 (6 of 6)    | 0 (6 of 6)        | 0 (6 of 6)    | 0 (6 of 6)        | 0 (6 of 6)    | 0 (6 of 6)     |
| 12 hours                    | 0 (6 of 6)    | 0 (6 of 6)        | 0 (6 of 6)    | 0 (6 of 6)        | 0 (6 of 6)    | 0 (6 of 6)     |
| 24 hours                    | 0 (6 of 6)    | 0 (6 of 6)        | 0 (6 of 6)    | 0 (6 of 6)        | 0 (6 of 6)    | 0 (6 of 6)     |
| day 7                       | 0 (6 of 6)    | 0 (6 of 6)        | 0 (6 of 6)    | 0 (6 of 6)        | 0 (6 of 6)    | 0 (6 of 6)     |
| day 14                      | 0 (6 of 6)    | 0 (6 of 6)        | 0 (6 of 6)    | 0 (6 of 6)        | 0 (6 of 6)    | 0 (6 of 6)     |
| day 21                      | 0 (6 of 6)    | 0 (6 of 6)        | 0 (6 of 6)    | 0 (6 of 6)        | 0 (6 of 6)    | 0 (6 of 6)     |
| day 28                      | 0 (6 of 6)    | 0 (6 of 6)        | 0 (6 of 6)    | 0 (6 of 6)        | 0 (6 of 6)    | 0 (6 of 6)     |
| <b>Aqueous humour</b>       |               |                   |               |                   |               |                |
| Pre-dose                    | 0 (6 of 6)    | 0 (6 of 6)        | 0 (6 of 6)    | 0 (6 of 6)        | 0 (6 of 6)    | 0 (6 of 6)     |
| 3 hours                     | 0 (6 of 6)    | 0 (6 of 6)        | 0 (6 of 6)    | 0 (6 of 6)        | 0 (6 of 6)    | 0 (6 of 6)     |
| 6 hours                     | 0 (6 of 6)    | 0 (6 of 6)        | 0 (6 of 6)    | 0 (6 of 6)        | 0 (6 of 6)    | 0 (6 of 6)     |
| 12 hours                    | 0 (6 of 6)    | 0 (6 of 6)        | 0 (6 of 6)    | 0 (6 of 6)        | 0 (6 of 6)    | 0 (6 of 6)     |
| 24 hours                    | 0 (6 of 6)    | 0 (6 of 6)        | 0 (6 of 6)    | 0 (6 of 6)        | 0 (6 of 6)    | 0 (6 of 6)     |
| day 7                       | 0 (6 of 6)    | 0 (6 of 6)        | 0 (6 of 6)    | 0 (6 of 6)        | 0 (6 of 6)    | 0 (6 of 6)     |
| day 14                      | 0 (6 of 6)    | 0 (6 of 6)        | 0 (6 of 6)    | 0 (6 of 6)        | 0 (6 of 6)    | 0 (6 of 6)     |
| day 21                      | 0 (6 of 6)    | 0 (6 of 6)        | 0 (6 of 6)    | 0 (6 of 6)        | 0 (6 of 6)    | 0 (6 of 6)     |
| day 28                      | 0 (6 of 6)    | 0 (6 of 6)        | 0 (6 of 6)    | 0 (6 of 6)        | 0 (6 of 6)    | 0 (6 of 6)     |

Ophthalmic observation scores according to severity (Table 1) of ocular lesions. G1: Sham-treated; G2: En-hLMSCs; G3: En+hLMSCs.

**Supplementary Table S3.** Serial evaluation of IOP after treatment with *En+*/*En-* hLMSCs.

| <b>Intraocular pressure of the treated eyes</b> |                 |                |                |                 |                 |              |               |               |               |
|-------------------------------------------------|-----------------|----------------|----------------|-----------------|-----------------|--------------|---------------|---------------|---------------|
| <b>Group</b>                                    | <b>Pre-dose</b> | <b>3 hours</b> | <b>6 hours</b> | <b>12 hours</b> | <b>24 hours</b> | <b>Day 7</b> | <b>Day 14</b> | <b>Day 21</b> | <b>Day 28</b> |
| G1                                              | 10.5            | 10.0           | 11.0           | 11.0            | 13.0            | 13.0         | 12.0          | 13.0          | 12.5          |
| G2                                              | 12.5            | 9.0            | 10.0           | 11.5            | 13.0            | 11.0         | 12.0          | 15.0          | 12.0          |
| G3                                              | 12.0            | 12.0           | 9.0            | 11.0            | 12.5            | 13.0         | 13.0          | 11.0          | 12.5          |
| <i>p</i> -value                                 | 0.185           | 0.063          | 0.268          | 0.855           | 0.953           | 0.154        | 0.718         | 0.069         | 0.349         |
| <b>Intraocular pressure of the normal eyes</b>  |                 |                |                |                 |                 |              |               |               |               |
| G1                                              | 12              | 10.5           | 13             | 13.5            | 13.5            | 14           | 13            | 13.5          | 13            |
| G2                                              | 13.5            | 8              | 13.5           | 13              | 13.5            | 12.5         | 12            | 13            | 12            |
| G3                                              | 12.5            | 10             | 12.5           | 13.5            | 13.5            | 12           | 13.5          | 12.5          | 12            |
| <i>p</i> -value                                 | 0.715           | 0.067          | 0.877          | 0.792           | 0.999           | 0.056        | 0.586         | 0.498         | 0.017         |

Scores of ophthalmic observations based on ocular lesion severity (Table 1). G1—Sham-treated group; G2—En-hLMSCs; G3—En+ hLMSCs. Statistical analysis done with Kruskal Wallis test.

**Supplementary Table S4.** Serum and tear immunological and inflammatory markers after En+/En- hLMSCs treatment.

| Group                                                 | 1 hours | 3 hours | 6 hours | 12 hours | 24 hours | Day 7 | Day 14 | Day 21 | Day 28 |
|-------------------------------------------------------|---------|---------|---------|----------|----------|-------|--------|--------|--------|
| <b>Median levels of inflammatory markers in serum</b> |         |         |         |          |          |       |        |        |        |
| <b>IgE (µg/mL)</b>                                    |         |         |         |          |          |       |        |        |        |
| G1                                                    | 0.961   | NA*     | 0.684   | 0.327    | 0.592    | 1.205 | 0.789  | 0.84   | 0.626  |
| G2                                                    | 0.787   | NA*     | 0.659   | 0.736    | 0.685    | 1.555 | 1.085  | 1.655  | 0.537  |
| G3                                                    | 1.845   | NA*     | 1.588   | 2.28     | 2.145    | 1.875 | 2.165  | 1.865  | 1.95   |
| <i>p</i> -value                                       | 0.048   | NA*     | 0.067   | 0.016    | 0.022    | 0.549 | 0.024  | 0.206  | 0.017  |
| <b>IL-6 (pg/mL)</b>                                   |         |         |         |          |          |       |        |        |        |
| G1                                                    | 1025    | NA*     | 294.1   | 345.2    | 462.2    | 162.1 | 251.8  | 199.9  | 363.6  |
| G2                                                    | 735.5   | NA*     | 291.6   | 209.6    | 189.8    | 148.3 | 212.5  | 207.9  | 211.2  |
| G3                                                    | 373.6   | NA*     | 209.2   | 176.3    | 195.6    | 180.4 | 171.2  | 215.6  | 174.6  |
| <i>p</i> -value                                       | 0.019   | NA*     | 0.737   | 0.504    | 0.258    | 0.222 | 0.331  | 0.549  | 0.296  |
| <b>TNF-α (pg/mL)</b>                                  |         |         |         |          |          |       |        |        |        |
| G1                                                    | 171.4   | NA*     | 26      | 44.2     | 37.1     | 36.6  | 31.2   | 49.5   | 41.4   |
| G2                                                    | 165.7   | NA*     | 28.9    | 23.7     | 37.3     | 33.9  | 25     | 34.3   | 27.1   |
| G3                                                    | 110.9   | NA*     | 18.2    | 20.1     | 15.9     | 26.9  | 24.1   | 31.7   | 23.9   |
| <i>p</i> -value                                       | 0.386   | NA*     | 0.199   | 0.544    | 0.089    | 0.354 | 0.471  | 0.271  | 0.187  |
| <b>Median levels of inflammatory markers in tears</b> |         |         |         |          |          |       |        |        |        |
| <b>IgE (µg/mL)</b>                                    |         |         |         |          |          |       |        |        |        |
| G1                                                    | 32.5    | 29.5    | 30.2    | 31.8     | 25.5     | 17.77 | 25.2   | 9.7    | 23.2   |
| G2                                                    | 165.7   | 98.5    | 26.4    | 17.5     | 27.1     | 22.73 | 17.9   | 18.5   | 22.1   |
| G3                                                    | 30.7    | 26.4    | 26.1    | 26.9     | 21.1     | 5.87  | 18.9   | 7.4    | 18     |
| <i>p</i> -value                                       | 0.023   | 0.026   | 0.471   | 0.341    | 0.737    | 0.116 | 0.528  | 0.344  | 0.603  |
| <b>IL-6 (pg/mL)</b>                                   |         |         |         |          |          |       |        |        |        |
| G1                                                    | 284.3   | 274.5   | 345.2   | 325.5    | 275.7    | 316.2 | 345.2  | 454.9  | 357.7  |
| G2                                                    | 177.9   | 188.7   | 192.7   | 154.5    | 191.8    | 198.6 | 166.2  | 176.3  | 195.1  |
| G3                                                    | 282.2   | 269     | 257.8   | 279.7    | 114.9    | 98.3  | 91.4   | 100.8  | 110.6  |
| <i>p</i> -value                                       | 0.021   | 0.008   | 0.012   | 0.012    | 0.006    | 0.005 | 0.004  | 0.004  | 0.014  |
| <b>TNF-α (pg/mL)</b>                                  |         |         |         |          |          |       |        |        |        |
| G1                                                    | 67.2    | 51.9    | 67.9    | 71.1     | 56.4     | 50.5  | 59.6   | 61.1   | 54.5   |
| G2                                                    | 28.7    | 27.6    | 27.9    | 30.2     | 31.9     | 30.7  | 31.4   | 30.8   | 32.9   |
| G3                                                    | 31.1    | 43.1    | 42.6    | 47.9     | 34.7     | 33.1  | 27.3   | 25.6   | 42.6   |
| <i>p</i> -value                                       | 0.091   | 0.108   | 0.005   | 0.004    | 0.253    | 0.109 | 0.071  | 0.071  | 0.028  |

Median levels and Kruskal Wallis test analysis (non-parametric one-way ANOVA). \*3-hour blood samples were not taken, but tear samples were. G1: Sham-treated; G2: En-hLMSCs; G3: En+ hLMSCs.

**Supplementary Table S5.** Hematological observations made on rabbits following treatment with hLMSCs.

| S. No. | Parameter                             | G1<br>(sham)  | G2<br>(En- hLMSCs) | G3<br>(En+ hLMSCs) | Units                   |
|--------|---------------------------------------|---------------|--------------------|--------------------|-------------------------|
| 1.     | Haematocrit                           | 44.8 ± 3.31   | 42.5 ± 4.87        | 40.73 ± 2.35       | %                       |
| 2.     | Hemoglobin                            | 13.83 ± 1.06  | 13.10 ± 1.61       | 12.93 ± 0.72       | gm/dL                   |
| 3.     | Mean Corpuscular Volume               | 72.35 ± 2.59  | 70.33 ± 3.23       | 70.90 ± 1.97       | fL                      |
| 4.     | Platelets                             | 384 ± 152.69  | 330.5 ± 69.85      | 461.17 ± 215.31    | 10 <sup>3</sup> /μL     |
| 5.     | Red Blood Corpuscles                  | 6.19 ± 0.4    | 6.06 ± 0.77        | 5.75 ± 0.24        | 10 <sup>6</sup> /μL     |
| 6.     | White blood Corpuscles                | 9.97 ± 3.04   | 7.93 ± 1.54        | 8.63 ± 3.01        | 10 <sup>3</sup> /μL     |
| 7.     | Differential Count                    |               |                    |                    |                         |
|        | Neutrophils                           | 40.67 ± 8.90  | 32.0 ± 5.29        | 3.83 ± 15.68       | %                       |
|        | Lymphocytes                           | 52.50 ± 10.08 | 62.67 ± 5.76       | 50.17 ± 15.42      | %                       |
|        | Monocytes                             | 4.5 ± 1.38    | 3.67 ± 0.75        | 4.00 ± 0.58        | %                       |
|        | Eosinophil                            | 2.33 ± 0.75   | 1.67 ± 0.47        | 2.0 ± 0.58         | %                       |
|        | Basophils                             | 0.00 ± 0.00   | 0.00 ± 0.00        | 0.00 ± 0.00        | %                       |
| 8.     | Reticulocyte Count                    | 1.83 ± 0.08   | 1.86 ± 0.06        | 1.87 ± 0.05        | %                       |
| 9.     | Bleeding Time                         | 3.06 ± 0.29   | 3.25 ± 0.14        | 3.08 ± 0.30        | minutes                 |
| 10.    | Coagulation Time                      | 6.98 ± 0.33   | 7.22 ± 0.37        | 6.98 ± 0.33        | minutes                 |
| 11.    | Prothrombin Time                      | 16.17 ± 1.07  | 16.33 ± 0.94       | 16.67 ± 1.11       | seconds                 |
| 12.    | Activated Partial Thromboplastin Time | 39.67 ± 4.03  | 41.00 ± 2.08       | 40.33 ± 1.70       | seconds                 |
| 13.    | Erythrocyte Sedimentation Rate        | 4.0 ± 3.21    | 5.67 ± 3.35        | 5.33 ± 1.89        | mm/1 <sup>st</sup> hour |

Group G1, G2, and G3 rabbit blood parameters. Test item-administered animals did not differ from vehicle control group animals. p>0.05. G1: Sham-treated; G2: En-hLMSCs; G3: En+ hLMSCs. Statistical analysis done with t-test.

**Supplementary Table S6.** Rabbit clinical chemistry after En-/En+ hLMSC treatment.

| S. No. | Parameter                  | G1<br>(sham)   | G2<br>(En- hLMSCs) | G3<br>(En+ hLMSCs) | Units  |
|--------|----------------------------|----------------|--------------------|--------------------|--------|
| 1.     | Serum Glucose              | 112.83 ± 17.49 | 117.67 ± 12.76     | 115.33 ± 6.39      | mg/dL  |
| 2.     | Blood Urea Nitrogen        | 21.50 ± 2.99   | 21.67 ± 3.35       | 22.50 ± 3.64       | mg/dL  |
| 3.     | Serum Creatinine           | 0.95 ± 0.13    | 0.85 ± 0.08        | 0.98 ± 0.29        | mg/dL  |
| 4.     | Serum Total Bilirubin      | 0.05 ± 0.00    | 0.05 ± 0.01        | 0.05 ± 0.00        | mg/dL  |
| 5.     | Alanine Aminotransferase   | 61.83 ± 12.56  | 59.50 ± 26.91      | 81.67± 32.03       | IU/L   |
| 6.     | Aspartate Aminotransferase | 62.17 ± 13.03  | 74.17 ± 67.73*     | 61.00 ± 11.65      | IU/L   |
| 7.     | Serum Alkaline phosphatase | 86.67 ± 39.77  | 134.83 ± 48.47     | 107.83 ± 28.37     | IU/L   |
| 8.     | Serum Total Protein        | 6.0 ± 0.18     | 5.63 ± 0.38        | 5.82 ± 0.25        | g/dL   |
| 9.     | Serum Albumin              | 2.40 ± 0.07    | 2.36 ± 0.20        | 2.46 ± 0.10        | g/dL   |
| 10.    | Globulin                   | 3.60 ± 0.21    | 3.27 ± 0.21*       | 3.38 ± 0.23        | g/dL   |
| 11.    | Serum Total Cholesterol    | 56.33 ± 29.03  | 59.00 ± 13.76      | 74.83 ± 37.75      | mg/dL  |
| 12.    | High-density lipoprotein   | 23.50 ± 11.91  | 29.17 ± 9.15       | 30.83 ± 10.35      | mg/dL  |
| 13.    | Low-density lipoprotein    | 27.00 ± 16.90  | 25.67 ± 7.36       | 36.50 ± 23.68      | mg/dL  |
| 14.    | Serum Phosphorous          | 5.83 ± 0.39    | 6.22 ± 0.46        | 7.35 ± 1.11        | mg/dL  |
| 15.    | Serum Calcium              | 12.98 ± 0.19   | 12.80 ± 0.46       | 12.67 ± 0.40       | mg/dL  |
| 16.    | Serum Sodium               | 158.40 ± 3.19  | 153.26 ± 5.01*     | 152.47 ± 1.86      | mmol/L |
| 17.    | Serum Potassium            | 4.84 ± 0.21    | 4.73 ± 0.36        | 5.50 ± 0.91        | mmol/L |
| 18.    | Gamma-glutamyl transferase | 8.42 ± 3.30    | 10.65 ± 3.46       | 9.48 ± 4.33        | IU/L   |

Group G1, G2, and G3 rabbit biochemical parameters. Clinical parameters did not affect systemic organs. \*p≤ 0.05. G1: Sham-treated; G2: En-hLMSCs; G3: En+ hLMSCs. Statistical analysis was done with t-test.

**Supplementary Table S7.** Summary of histopathological observations of rabbit organs post-treatment with hLMSCs.

| S.No. | Organ                    | Observations                                                                            | G1<br>(sham) | G2<br>(En- hLMSCs) | G3<br>(En+ hLMSCs) |
|-------|--------------------------|-----------------------------------------------------------------------------------------|--------------|--------------------|--------------------|
| 1.    | Liver                    | Sinusoidal hemorrhage                                                                   | 2/6*         | 2/6                | 2/6                |
|       |                          | Inflammation/necrosis/infiltration of inflammatory cells in centrilobular portal region | 1/6          | 0/6                | 0/6                |
|       |                          | No Abnormality Detected (NAD)                                                           | 3/6          | 4/6                | 4/6                |
| 2.    | Spleen                   | NAD                                                                                     | 6/6          | 6/6                | 6/6                |
| 3.    | Lungs                    | Thickening of alveolar wall/ inflammation                                               | 5/6          | 5/6                | 4/6                |
|       |                          | NAD                                                                                     | 1/6          | 1/6                | 2/6                |
| 4.    | Heart                    | NAD                                                                                     | 6/6          | 6/6                | 6/6                |
| 5.    | Aorta                    | NAD                                                                                     | 6/6          | 6/6                | 6/6                |
| 6.    | Kidney                   | Tubular degeneration                                                                    | 0/6          | 1/6                | 1/6                |
|       |                          | Tubular/ interstitial inflammation                                                      | 3/6          | 1/6                | 1/6                |
|       |                          | NAD                                                                                     | 3/6          | 4/6                | 4/6                |
| 7.    | Adrenals                 | NAD                                                                                     | 6/6          | 6/6                | 6/6                |
| 8.    | Brain                    | Foci of cerebral necrosis/ perivascular cuffing                                         | 2/6          | 1/6                | 0/6                |
|       |                          | NAD                                                                                     | 4/6          | 5/6                | 6/6                |
| 9.    | Thyroid and Para thyroid | NAD                                                                                     | 6/6          | 6/6                | 6/6                |
| 10.   | Trachea                  | NAD                                                                                     | 6/6          | 6/6                | 6/6                |
| 11.   | Oesophagus               | NAD                                                                                     | 6/6          | 6/6                | 6/6                |
| 12.   | Duodenum                 | NAD                                                                                     | 6/6          | 6/6                | 6/6                |
| 13.   | Jejunum                  | NAD                                                                                     | 6/6          | 6/6                | 6/6                |
| 14.   | Ileum                    | Sub mucosal lymphoid tissue hyperplasia                                                 | 1/6          | 1/6                | 0/6                |
|       |                          | NAD                                                                                     | 5/6          | 5/6                | 6/6                |
| 15.   | Colon                    | NAD                                                                                     | 6/6          | 6/6                | 6/6                |
| 16.   | Rectum                   | NAD                                                                                     | 6/6          | 6/6                | 6/6                |
| 17.   | Lymph nodes              | NAD                                                                                     | 6/6          | 6/6                | 6/6                |
| 18.   | Pancreas                 | NAD                                                                                     | 6/6          | 6/6                | 6/6                |
| 19.   | Thymus                   | NAD                                                                                     | 6/6          | 6/6                | 6/6                |
| 20.   | Urinary bladder          | NAD                                                                                     | 6/6          | 6/6                | 6/6                |
| 21.   | Stomach                  | NAD                                                                                     | 6/6          | 6/6                | 6/6                |
| 22.   | Skeletal muscle          | NAD                                                                                     | 6/6          | 6/6                | 6/6                |
| 23.   | Skin                     | NAD                                                                                     | 6/6          | 6/6                | 6/6                |
| 24.   | Spinal cord              | NAD                                                                                     | 6/6          | 6/6                | 6/6                |
| 25.   | Middle ear               | NAD                                                                                     | 6/6          | 6/6                | 6/6                |
| 26.   | Eye                      | NAD                                                                                     | 6/6          | 6/6                | 6/6                |

\*Key: No. of animals showing observation/Total no. of animals. Group 1 received no treatment (sham group); Group 2 received En-hLMSCs; and Group 3 received En+ hLMSCs.



**Supplementary Table S8.** Organ weight summaries after hLMSC treatment in rabbits.

| S. No. | Organ           | G1<br>(sham)  | G2<br>(En- hLMSCs) | G3<br>(En+ hLMSCs) |
|--------|-----------------|---------------|--------------------|--------------------|
| 1.     | Brain           | 8.42 ± 0.85   | 8.11 ± 0.63        | 8.10 ± 0.85        |
| 2.     | Heart           | 6.28 ± 0.53   | 7.57 ± 1.17        | 7.01 ± 1.62        |
| 3.     | Liver           | 73.15 ± 10.09 | 80.70 ± 16.78      | 71.72 ± 15.87      |
| 4.     | Spleen          | 1.05 ± 0.33   | 1.14 ± 0.39        | 0.76 ± 0.20        |
| 5.     | Kidney          | 14.80 ± 1.17  | 15.60 ± 1.67       | 16.53 ± 4.20       |
| 6.     | Adrenals        | 0.39 ± 0.25   | 0.33 ± 0.05        | 0.31 ± 0.08        |
| 7.     | Testes (male)   | 5.39 ± 2.27   | 6.11 ± 1.23        | 3.97 ± 1.45        |
| 8.     | Uterus (female) | 6.489 ± 3.31  | 7.003 ± 1.42       | 4.309 ± 2.25       |
| 9.     | Lungs           | 9.32 ± 0.99   | 10.13 ± 0.51       | 9.46 ± 1.84        |

Summarized here are the mean (in grams) weights of the various organs removed from the test animals. Animals given the test item showed no discernible differences from those given the vehicle. Calculations were done using a mean and standard deviation format, and a significance level of  $p < 0.05$  was reached. Group 1 received no treatment (sham group); Group 2 received En-hLMSCs; and Group 3 received En+ hLMSCs. Statistical analysis was done with t-test.
